# Supplementary material for: Social Listening: A Content Analysis of E-Cigarette Discussions on Twitter
Source: PubMed Central journal article supplement (PMC4642379; doi:10.2196/jmir.4969), 2015-10-27
Supplement: jmir_v17i10e243_app1.pdf [file jmir_v17i10e243_app1.pdf]

**Multimedia Appendix 1.** Tweet filter keywords.

Vaping  
Vape  
Vaper  
Vapers  
Vapin  
Vaped  
Evape  
Vaporing  
e-cig\*<sup>a</sup>  
ecig\*<sup>a</sup>  
e-pen  
epen  
e-juice  
ejuice  
e-liquid  
eliquid  
cloud chasing  
cloudchasing  
deeming AND regulation  
deeming AND FDA  
deemed AND FDA  
Deem\*<sup>a</sup> and FDA

<sup>a</sup>Word stem used to identify any word beginning with these characters.
