# Supplementary material for: Social Listening: A Content Analysis of E-Cigarette Discussions on Twitter
Source: PubMed Central journal article supplement (PMC4642379; doi:10.2196/jmir.4969), 2015-10-27
Supplement: jmir_v17i10e243_app2.pdf [file jmir_v17i10e243_app2.pdf]

**Multimedia Appendix 2.** Data collection web form.

387 ) Final testing phase of new flavour can't wait to get this out to everyone #vape #vaping #ejuice #eliquid #vapelite http://t.co/

Author: [Redacted]

Posted Date: Thu Apr 16 14:14:57 +0000 2015

**User Description**

- Celebrity
- Government
- Foundations or organizations
- Reputable News Source
- Every day people
- E-cig community movement
- Retailers
- Tobacco Company
- Bots/Hacked

**Sentiment**

- Negative
- Neutral
- Positive

**Content Type A**

- News/update
- Info
- 1st person e-cig use or intent
- Second/Third person experience
- Personal opinion
- Marketing

**Content Type B**

- Link to an image
- Link to a video
- Link to a location
- Link to a website
- Broken Link
- No Link

**Content Theme**

- |                                                          |                                                              |                                                 |
|----------------------------------------------------------|--------------------------------------------------------------|-------------------------------------------------|
| <input type="checkbox"/> Cessations                      | <input type="checkbox"/> Health and Safety                   | <input type="checkbox"/> Underage usage         |
| <input type="checkbox"/> Emotional Response              | <input type="checkbox"/> Craving                             | <input type="checkbox"/> Other substances       |
| <input type="checkbox"/> Illicit substance use in e-cigs | <input type="checkbox"/> Policy or Government                | <input type="checkbox"/> Parental use of e-cigs |
| <input type="checkbox"/> Normalization of e-cigs         | <input checked="" type="checkbox"/> Advertisement/ Promotion | <input checked="" type="checkbox"/> Flavors     |

**Comments**

Save
