# Supplementary material for: Social Listening: A Content Analysis of E-Cigarette Discussions on Twitter
Source: PubMed Central journal article supplement (PMC4642379; doi:10.2196/jmir.4969), 2015-10-27
Supplement: jmir_v17i10e243_app3.pdf [file jmir_v17i10e243_app3.pdf]

### Multimedia Appendix 3. Definitions of annotation categories.

---

Relevance: Identifies tweets that are related to e-cigarettes.

---

|              |                                                                                                                                                                                                                                                                                                                                                                                                      |
|--------------|------------------------------------------------------------------------------------------------------------------------------------------------------------------------------------------------------------------------------------------------------------------------------------------------------------------------------------------------------------------------------------------------------|
| Relevant     | Tweet that includes topics related to e-cigarettes. Subcategories include: retweets that offered no additional information from the person posting the tweet; original tweets that were part of a conversation and require greater context to be interpreted; or duplicated tweets from a user account that had since been suspended or was primarily being used for spam or unwanted solicitations. |
| Not relevant | Tweets that do not include information related to e-cigarettes.                                                                                                                                                                                                                                                                                                                                      |

---

Sentiment: Indicates whether the stance in the tweet is positive, neutral, or negative towards e-cigarettes and users of e-cigarettes.

---

|          |                                                                                                                                    |
|----------|------------------------------------------------------------------------------------------------------------------------------------|
| Positive | Tweets that are in favor of e-cigarettes (eg, like, happy, uses words like “genius” or #lovevape; boasting about e-cigarette use). |
| Neutral  | Tweets not strong in either direction for or against e-cigarettes.                                                                 |
| Negative | Tweets with that are against e-cigarettes (eg, don’t like, not impressed, uses words like “hate” or #EPICFAIL).                    |

---

User description: Characterizes the sender of the tweet based on information gleaned from the user profile (eg, e-cigarette company, everyday user of Twitter, reputable news source).

---

|                                |                                                                                                                                                                                                      |
|--------------------------------|------------------------------------------------------------------------------------------------------------------------------------------------------------------------------------------------------|
| Celebrity                      | Famous people in pop culture, people that are internet famous, people that have accounts verified by Twitter.                                                                                        |
| Government                     | National Institutes of Health, Centers for Disease Control and Prevention, Political figures, etc.                                                                                                   |
| Foundations or organizations   | Reputable organizations such as American Heart Association.                                                                                                                                          |
| Reputable news source          | New sources such as New York Times, Washington Post, Wall Street Journal, Associated Press, etc.                                                                                                     |
| Everyday people                | Twitter account with a reasonable amount of posts, followers, and following a reasonable amount of people with a timeline that spans a variety of topics that are not primarily e-cigarette related. |
| E-cigarette community movement | Groups or person whose timelines are primarily devoted to e-cigarette conversations (eg, Women Who Vape, The Vape Club, John Doe with entire timeline of e-cigarette tweets).                        |
| Retailers                      | Outlets that sell e-cigarettes (online or physical).                                                                                                                                                 |
| Tobacco company                | Companies that manufacture e-cigarettes (eg, blu, Apollo, Njoy).                                                                                                                                     |
| Bots/hacked                    | Accounts that appear to be fake/computerized that are primarily promoting e-cigarette products (or other products); most accounts are disguised to appear as "everyday users."                       |

---

Genre: Represents the format of the tweet (eg, news or update, first person experience, marketing).

---

|             |                                                                                                                                           |
|-------------|-------------------------------------------------------------------------------------------------------------------------------------------|
| News/update | Update about a current event from a reputable news source, or post from user about relevant news from news source.                        |
| Information | Factoid or resource, can be a personal blog or forum, or link to product review (posted by every day user or e-cigarette comm. Movement). |

|                                        |                                                                                                                                                                                                                                     |
|----------------------------------------|-------------------------------------------------------------------------------------------------------------------------------------------------------------------------------------------------------------------------------------|
| First person e-cigarette use or intent | Reports personal use of, intent, or interest to use e-cigarettes.                                                                                                                                                                   |
| Second/third person experience         | Reports someone else's use of e-cigarettes.                                                                                                                                                                                         |
| Personal opinion                       | Personal opinion related to e-cigarettes.                                                                                                                                                                                           |
| Marketing                              | Activities involved in the transfer of goods from the producer or seller to the consumer or buyer (eg, sales of e-cigarette products or accessories, job announcements, review of products posted by e-cigarette company/retailer). |

---

Theme: Refers to the topical domain of the content in the tweet.

---

|                                       |                                                                                                                                                     |
|---------------------------------------|-----------------------------------------------------------------------------------------------------------------------------------------------------|
| Cessation                             | Mention of using e-cigarettes to quit smoking cigarettes or other non-e-cigarette tobacco products.                                                 |
| Health and safety                     | Direct or indirect reference to health consequences of e-cigarette use.                                                                             |
| Underage usage                        | E-cigarette use by minors, especially high school age or under, (only if proof the person writing the tweet or mentioned in the tweet is underage). |
| Craving                               | Desire to use e-cigarettes (eg, "Stressful day. Time for my #vapepen").                                                                             |
| Other substances                      | E-cigarettes mentioned in association with other addictive substances, such as alcohol, caffeine.                                                   |
| Illicit substance use in e-cigarettes | Mention of using e-cigarettes for anything other than nicotine (eg, marijuana).                                                                     |
| Policy or government                  | Mention of government or policy in relation to e-cigarettes including, regulation, deeming, bans, and restrictions.                                 |
| Parental use of e-cigarettes          | Tweet mentioning use of e-cigarettes by parents of the poster or parents of a person mentioned in the tweet.                                        |
| Advertisement/promotion               | Ads for e-cigarettes, giveaways, samples, sales, direct links to seller's websites, word-of-mouth, and reviews.                                     |
| Flavors                               | Tweet discussing e-cigarette flavors (generic or mixed, including menthol).                                                                         |

---
