# Supplementary material for: Social Listening: A Content Analysis of E-Cigarette Discussions on Twitter
Source: PubMed Central journal article supplement (PMC4642379; doi:10.2196/jmir.4969), 2015-10-27
Supplement: jmir_v17i10e243_app4.pdf [file jmir_v17i10e243_app4.pdf]

#### Multimedia Appendix 4. Sample tweets by annotation category.

| Category                             | Sample tweet                                                                                                                                                 |
|--------------------------------------|--------------------------------------------------------------------------------------------------------------------------------------------------------------|
| <b>Relevance</b>                     |                                                                                                                                                              |
| Relevant                             | Don't give me shit about my ecig mom. At least it's not a cigarette!!!                                                                                       |
| Not relevant                         | Today stats: 4 new followers and one new unfollower via [URL redacted] <sup>a</sup>                                                                          |
| <b>Sentiment</b>                     |                                                                                                                                                              |
| Positive                             | I love my Adidas shorts and my vape                                                                                                                          |
| Neutral                              | @[Name Redacted] <sup>a</sup> E-cigs. Really hot topic. I'd be grateful to read your thoughts. Yea or nay?                                                   |
| Negative                             | E-cigarettes threaten to undo years of gains: Our view [URL redacted] via @usatoday                                                                          |
| <b>User descriptions</b>             |                                                                                                                                                              |
| Celebrity                            | From @BrunoMars: Day 1 E-Cig, Gotta do it!!! This is for you mom [URL redacted]                                                                              |
| Government                           | From @US_FDA: FDA proposes new rule that would regulate additional tobacco products, e-cigarettes, pipe & waterpipe tobacco & more. [URL redacted]           |
| Foundation/<br>organization          | From @Campaign4Kids: Senators Call on FTC, FDA to Protect Consumers from False Advertising Claims by E-Cigarette Makers [URL redacted] via @SenatorBoxer     |
| Reputable news<br>source             | From @Forbes: Chicago's e-cigarette ban has been blocked by "a surprise outpouring of opposition." [URL redacted]                                            |
| Everyday person                      | From @[Name Redacted]: my girl just got me a new vape pen :)                                                                                                 |
| E-cigarette<br>community<br>movement | From @E_Cigarette_: Smokeless Cigarettes More evidence e-cigs may help in quitting tobacco [URL redacted]                                                    |
| Retailers                            | From @SOURCEvapes: New #SOURCE #Orb attachments now available at TheVapeLifeStore/@VapeLifeWill! Don't miss out on the hottest new vape pen around! #newshit |
| Tobacco<br>company                   | From @LIVcigs: FDA announced deeming regulations on #ecigs last week. They are wrought with ignorance and fear of...[URL redacted]                           |
| Bot/hacked                           | From @RMTSweeps: Entered to win a 2013 Kia Soul by shopping for e-cigs and e-liquid at www.MyFreedomSmokesCom Check it Out! [URL redacted]                   |
| <b>Genre</b>                         |                                                                                                                                                              |
| News/update                          | Marlboro maker Altria jumping into e-cigarettes as found on <a href="http://t.co/yUMvHtXFw6">http://t.co/yUMvHtXFw6</a>                                      |
| Information                          | How an e-cig works. [URL redacted]                                                                                                                           |

|                                        |                                                                                                                                            |
|----------------------------------------|--------------------------------------------------------------------------------------------------------------------------------------------|
| First person e-cigarette use or intent | Ecigs make me cough too much...                                                                                                            |
| Second/third person experience         | watching someone smoke an E-Cig is so bizarre.. like this dude is walking around the marvin center smoking something that looks like a pen |
| Personal opinion                       | If you smoke ecigs in school right next to me I have absolutely no respect for you..                                                       |
| Marketing                              | Best Value Beginners Complete Electronic Cigarette Starter Kit with E-Liquid - Cool Breeze E-Cigs Gr [URL redacted]                        |
| <hr/>                                  |                                                                                                                                            |
| Theme                                  |                                                                                                                                            |
| Cessation                              | 5 days out. Staying strong. Ecig has been helpful. #quitting [URL redacted]                                                                |
| Health/safety                          | Research has found that 3 out of 10 e-cigarettes contain two carcinogens that aren't necessarily found in regular cigarettes.              |
| Underage use                           | [Name Redacted] just gave my 8 year old cousin a drag of her e-cig. #waytogo #auntoftheyear                                                |
| Craving                                | I want my vape so bad right now.                                                                                                           |
| Other substances                       | Vaping, drinking some macallans 18 and listening to some pink floyd. Life is good!!!                                                       |
| Illicit substance use in e-cigarettes  | im vaping hash oil in my room and my parents r watching something w/ gunfire on tv so that xmas eve lol                                    |
| Policy/government                      | @[Name Redacted] #Ecigs are the most significant public health and technological breakthrough this century. Don't let the #FDA limit them. |
| Parental use of e-cigarettes           | LOL I just found out my dad uses a vape HAHA                                                                                               |
| Advertisement/promotion                | I came, I saw, I vaped. Start vaping with VICE Vapes and let us be #yournewVICE [URL redacted]                                             |
| Flavors                                | Have you tried our NEW Platinum Vanilla E-Liquid yet? Get more vape for your buck! [URL redacted]                                          |

<sup>a</sup>Twitter handles associated with individuals and URLs have been redacted to maintain user privacy.
