# Supplementary material for: Social Listening: A Content Analysis of E-Cigarette Discussions on Twitter
Source: J Med Internet Res. 2015 Oct 27;17(10):e243. doi: 10.2196/jmir.4969 (PMC4642379; doi:10.2196/jmir.4969)
Supplement: Multimedia Appendix 5 [file jmir_v17i10e243_app5.pdf]

Multimedia Appendix 5. Correlation matrix for content categories.

|                           |             |         |          |           |            |            |                |                 |                       |             |                 |             |      |             |                     |                           |                  |             |           |               |                |         |                  |                    |                   |              |                         |         |
|---------------------------|-------------|---------|----------|-----------|------------|------------|----------------|-----------------|-----------------------|-------------|-----------------|-------------|------|-------------|---------------------|---------------------------|------------------|-------------|-----------|---------------|----------------|---------|------------------|--------------------|-------------------|--------------|-------------------------|---------|
| Positive                  | 1           |         |          |           |            |            |                |                 |                       |             |                 |             |      |             |                     |                           |                  |             |           |               |                |         |                  |                    |                   |              |                         |         |
| Neutral                   | <u>0.7</u>  | 1       |          |           |            |            |                |                 |                       |             |                 |             |      |             |                     |                           |                  |             |           |               |                |         |                  |                    |                   |              |                         |         |
| Negative                  | <u>0.58</u> | 0.17    | 1        |           |            |            |                |                 |                       |             |                 |             |      |             |                     |                           |                  |             |           |               |                |         |                  |                    |                   |              |                         |         |
| Celebrity                 | 0.03        | 0.02    | 0.02     | 1         |            |            |                |                 |                       |             |                 |             |      |             |                     |                           |                  |             |           |               |                |         |                  |                    |                   |              |                         |         |
| Government                | 0.04        | 0.01    | 0.06     | 0         | 1          |            |                |                 |                       |             |                 |             |      |             |                     |                           |                  |             |           |               |                |         |                  |                    |                   |              |                         |         |
| Foundation                | 0.13        | 0.08    | 0.09     | 0.01      | 0          | 1          |                |                 |                       |             |                 |             |      |             |                     |                           |                  |             |           |               |                |         |                  |                    |                   |              |                         |         |
| Reputable news            | 0.1         | 0.09    | 0.04     | 0.01      | 0          | 0.01       | 1              |                 |                       |             |                 |             |      |             |                     |                           |                  |             |           |               |                |         |                  |                    |                   |              |                         |         |
| Everyday people           | 0.21        | 0.13    | 0.15     | 0.09      | 0.04       | 0.15       | 0.12           | 1               |                       |             |                 |             |      |             |                     |                           |                  |             |           |               |                |         |                  |                    |                   |              |                         |         |
| E-cigarette community     | 0.17        | 0.11    | 0.11     | 0.03      | 0.01       | 0.05       | 0.04           | <u>0.59</u>     | 1                     |             |                 |             |      |             |                     |                           |                  |             |           |               |                |         |                  |                    |                   |              |                         |         |
| Retailer                  | 0.15        | 0.09    | 0.1      | 0.02      | 0.01       | 0.03       | 0.024          | <u>0.4</u>      | 0.13                  | 1           |                 |             |      |             |                     |                           |                  |             |           |               |                |         |                  |                    |                   |              |                         |         |
| Tobacco company           | 0.07        | 0.04    | 0.05     | 0.01      | 0          | 0.02       | 0.01           | 0.19            | 0.06                  | 0.04        | 1               |             |      |             |                     |                           |                  |             |           |               |                |         |                  |                    |                   |              |                         |         |
| Bots/hacked               | 0.06        | 0.03    | 0.05     | 0.02      | 0.01       | 0.03       | 0.02           | <u>0.37</u>     | 0.12                  | 0.08        | 0.04            | 1           |      |             |                     |                           |                  |             |           |               |                |         |                  |                    |                   |              |                         |         |
| News                      | <u>0.34</u> | 0.29    | 0.14     | 0.04      | 0.03       | 0.11       | 0.2            | 0.02            | 0.02                  | 0.05        | 0.01            | 0           | 1    |             |                     |                           |                  |             |           |               |                |         |                  |                    |                   |              |                         |         |
| Information               | 0.18        | 0.19    | 0.03     | 0.03      | 0.01       | 0.1        | 0.01           | 0.13            | 0.15                  | 0.04        | 0.01            | 0.02        | 0.12 | 1           |                     |                           |                  |             |           |               |                |         |                  |                    |                   |              |                         |         |
| Personal experience       | 0.2         | 0.11    | 0.14     | 0.01      | 0.01       | 0.06       | 0.04           | 0.3             | 0.16                  | 0.14        | 0.07            | 0.11        | 0.15 | 0.21        | 1                   |                           |                  |             |           |               |                |         |                  |                    |                   |              |                         |         |
| 2nd/3rd person experience | 0.16        | 0.11    | 0.1      | 0.01      | 0.01       | 0.03       | 0.02           | 0.15            | 0.09                  | 0.05        | 0.03            | 0.06        | 0.09 | 0.12        | 0.15                | 1                         |                  |             |           |               |                |         |                  |                    |                   |              |                         |         |
| Personal opinion          | 0.02        | 0.09    | 0.13     | 0.02      | 0.01       | 0.05       | 0.05           | 0.08            | 0.09                  | 0.11        | 0.06            | 0.09        | 0.19 | 0.26        | <u>0.32</u>         | 0.18                      | 1                |             |           |               |                |         |                  |                    |                   |              |                         |         |
| Marketing                 | <u>0.31</u> | 0.22    | 0.19     | 0.02      | 0.01       | 0.04       | 0.04           | <u>0.35</u>     | 0                     | <u>0.36</u> | 0.16            | 0.24        | 0.15 | 0.21        | 0.26                | 0.15                      | <u>0.32</u>      | 1           |           |               |                |         |                  |                    |                   |              |                         |         |
| Cessation                 | 0.05        | 0.04    | 0.02     | 0.01      | 0.02       | 0          | 0.03           | 0.01            | 0.01                  | 0.01        | 0               | 0           | 0    | 0           | 0.02                | 0.02                      | 0.07             | 0.05        | 1         |               |                |         |                  |                    |                   |              |                         |         |
| Health/safety             | 0.14        | 0.05    | 0.13     | 0.03      | 0.01       | 0.12       | 0.05           | 0.05            | 0.08                  | 0.06        | 0.03            | 0.02        | 0.17 | 0.19        | 0.16                | 0.08                      | 0.1              | 0.18        | 0.16      | 1             |                |         |                  |                    |                   |              |                         |         |
| Underage usage            | 0.18        | 0.06    | 0.18     | 0.02      | 0.03       | 0.11       | 0.03           | 0.06            | 0.05                  | 0.05        | 0.02            | 0.03        | 0.14 | 0.02        | 0.03                | 0.03                      | 0                | 0.11        | 0.03      | 0.09          | 1              |         |                  |                    |                   |              |                         |         |
| Craving                   | 0.11        | 0.07    | 0.07     | 0.01      | 0.01       | 0.02       | 0.02           | 0.13            | 0.08                  | 0.06        | 0.03            | 0.03        | 0.06 | 0.08        | <u>0.34</u>         | 0.03                      | 0.09             | 0.1         | 0.04      | 0.07          | 0.02           | 1       |                  |                    |                   |              |                         |         |
| Other substances          | 0.01        | 0       | 0.01     | 0.01      | 0          | 0          | 0.01           | 0.06            | 0.03                  | 0.02        | 0.02            | 0.03        | 0.02 | 0.02        | 0.06                | 0                         | 0.01             | 0.04        | 0.02      | 0             | 0.01           | 0.01    | 1                |                    |                   |              |                         |         |
| Illicit substances        | 0.02        | 0.01    | 0.01     | 0         | 0          | 0.01       | 0.01           | 0.07            | 0.05                  | 0.02        | 0.02            | 0.02        | 0.02 | 0.02        | 0.06                | 0.05                      | 0.01             | 0.05        | 0.03      | 0.04          | 0.02           | 0       | 0.08             | 1                  |                   |              |                         |         |
| Policy/government         | 0.11        | 0.11    | 0.03     | 0.01      | 0.05       | 0.07       | 0.08           | 0.14            | 0.23                  | 0.07        | 0.04            | 0.03        | 0.27 | 0.14        | 0.23                | 0.13                      | 0.24             | 0.25        | 0         | 0.21          | 0.04           | 0.1     | 0.04             | 0.06               | 1                 |              |                         |         |
| Parental use              | 0.01        | 0.01    | 0        | 0.01      | 0          | 0.01       | 0.01           | 0.06            | 0.03                  | 0.02        | 0.01            | 0.02        | 0.02 | 0.03        | 0.01                | 0.15                      | 0.01             | 0.04        | 0         | 0.02          | 0.05           | 0.01    | 0                | 0                  | 0.04              | 1            |                         |         |
| Advertisement/promotion   | <u>0.33</u> | 0.23    | 0.2      | 0.02      | 0.02       | 0.05       | 0.05           | <u>0.36</u>     | 0.05                  | <u>0.33</u> | 0.16            | 0.23        | 0.16 | 0.05        | 0.25                | 0.15                      | <u>0.3</u>       | <u>0.82</u> | 0.06      | 0.21          | 0.11           | 0.11    | 0.05             | 0.06               | 0.29              | 0.05         | 1                       |         |
| Flavors                   | 0.09        | 0.07    | 0.05     | 0.01      | 0.01       | 0.01       | 0.01           | 0.02            | 0.02                  | 0.05        | 0.01            | 0           | 0.05 | 0.04        | 0.06                | 0.02                      | 0.03             | 0.06        | 0.02      | 0.07          | 0.02           | 0.01    | 0.01             | 0.01               | 0.09              | 0            | 0.06                    | 1       |
|                           | Positive    | Neutral | Negative | Celebrity | Government | Foundation | Reputable news | Everyday people | E-cigarette community | Retailer    | Tobacco company | Bots\hacked | News | Information | Personal experience | 2nd/3rd person experience | Personal opinion | Marketing   | Cessation | Health/safety | Underage usage | Craving | Other substances | Illicit substances | Policy/government | Parental use | Advertisement/promotion | Flavors |
